# Supplementary material for: Synthesis, structures and photoluminescence properties of mixed ligand divalent metal–organic frameworks
Source: Royal Society of Chemistry journal article supplement (doi:10.1039/c7nj00188f), 2017-01-01
Supplement: c7nj00188f1.pdf [file c7nj00188f1.pdf]

## Supplementary Informations

### **Synthesis, structures and Photoluminescence properties of mixed ligand divalent metal-organic frameworks**

Muhammad Altaf,<sup>\*a</sup> Muhammad Mansha Chohan,<sup>a</sup> Manzar Sohail,<sup>a</sup> Anvarhusein A. Isab,<sup>b</sup> Nisar Ullah,<sup>b</sup> Safyan Akram Khan,<sup>a</sup> Muhammad Sher,<sup>a</sup> Hellen Stoeckli-Evans <sup>c</sup>

<sup>a</sup> Centre of Research Excellence in Nanotechnology (CENT), King Fahd University of Petroleum and Minerals, Dhahran 31261, Saudi Arabia.

<sup>b</sup> Department of Chemistry, King Fahd University of Petroleum and Minerals, Dhahran 31261, Saudi Arabia.

<sup>c</sup> Institute of Physics, University of Neuchatel, rue Emile-Argand 11, CH-2000 Neuchatel, Switzerland.

Email: [muhammadaltaf@kfupm.edu.sa](mailto:muhammadaltaf@kfupm.edu.sa)

Key words: Photoluminescence, Metal-Organic Frameworks, X-ray structures, TGA, Mixed Ligand

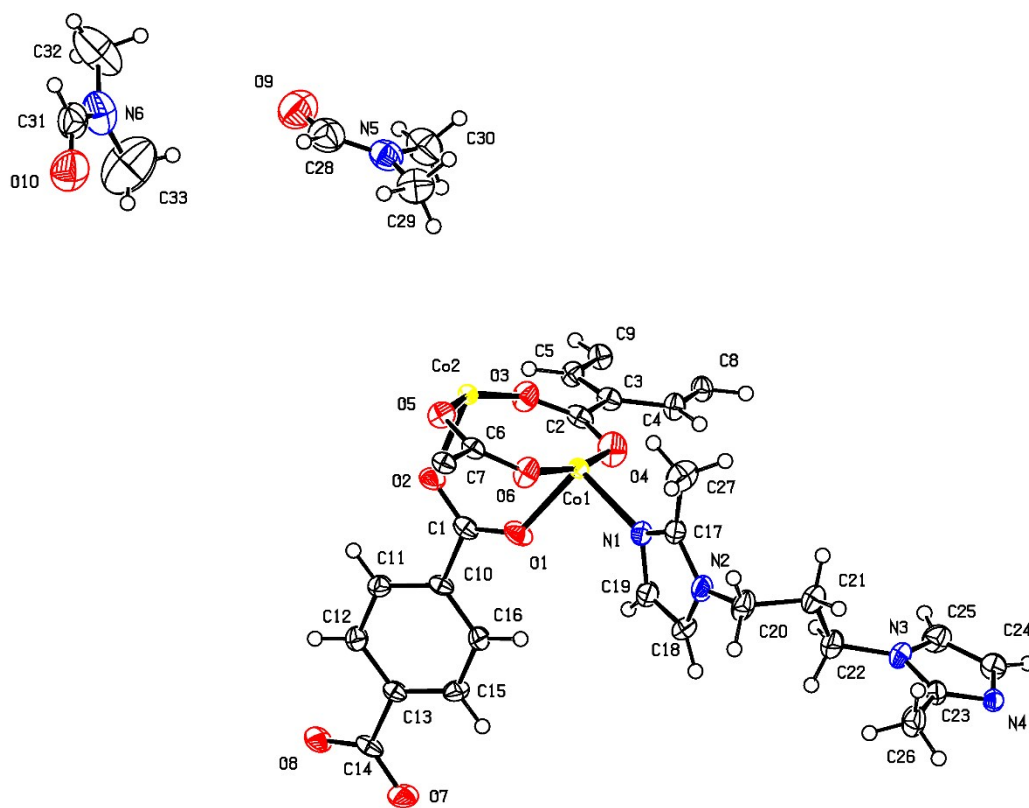

**Fig. 1S.** A view of the structure of asymmetric unit of compound 1.

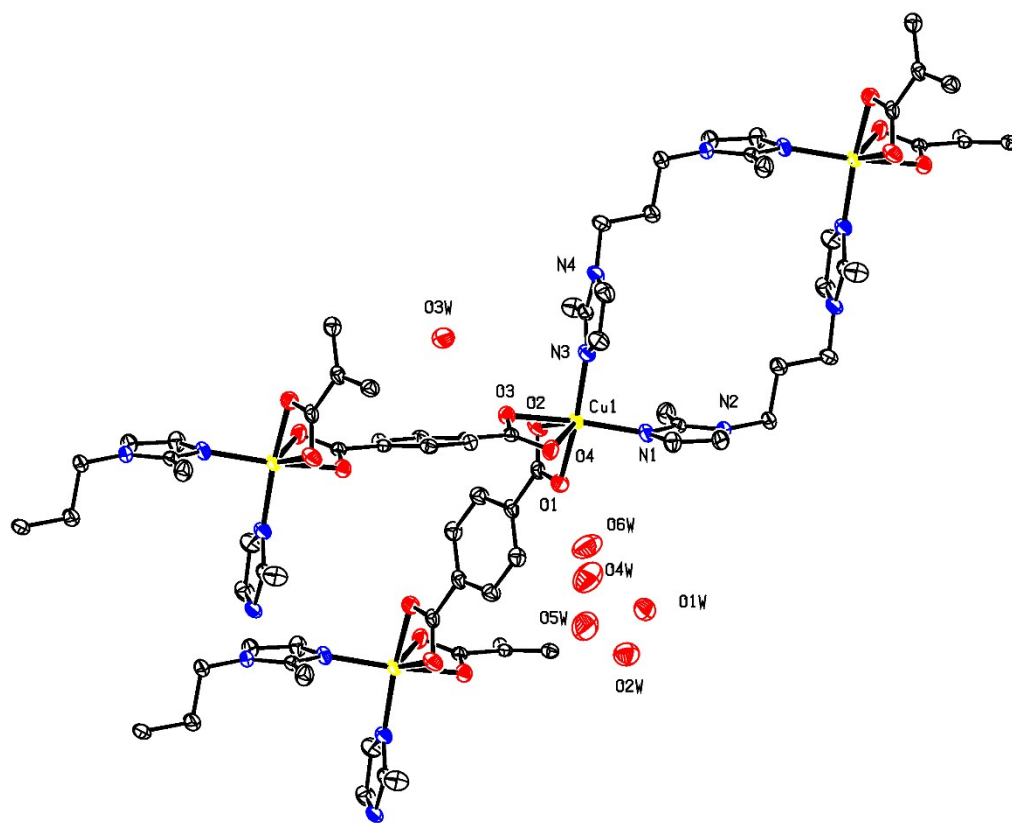

Fig. 2S. A view of molecular structure of compound 2.

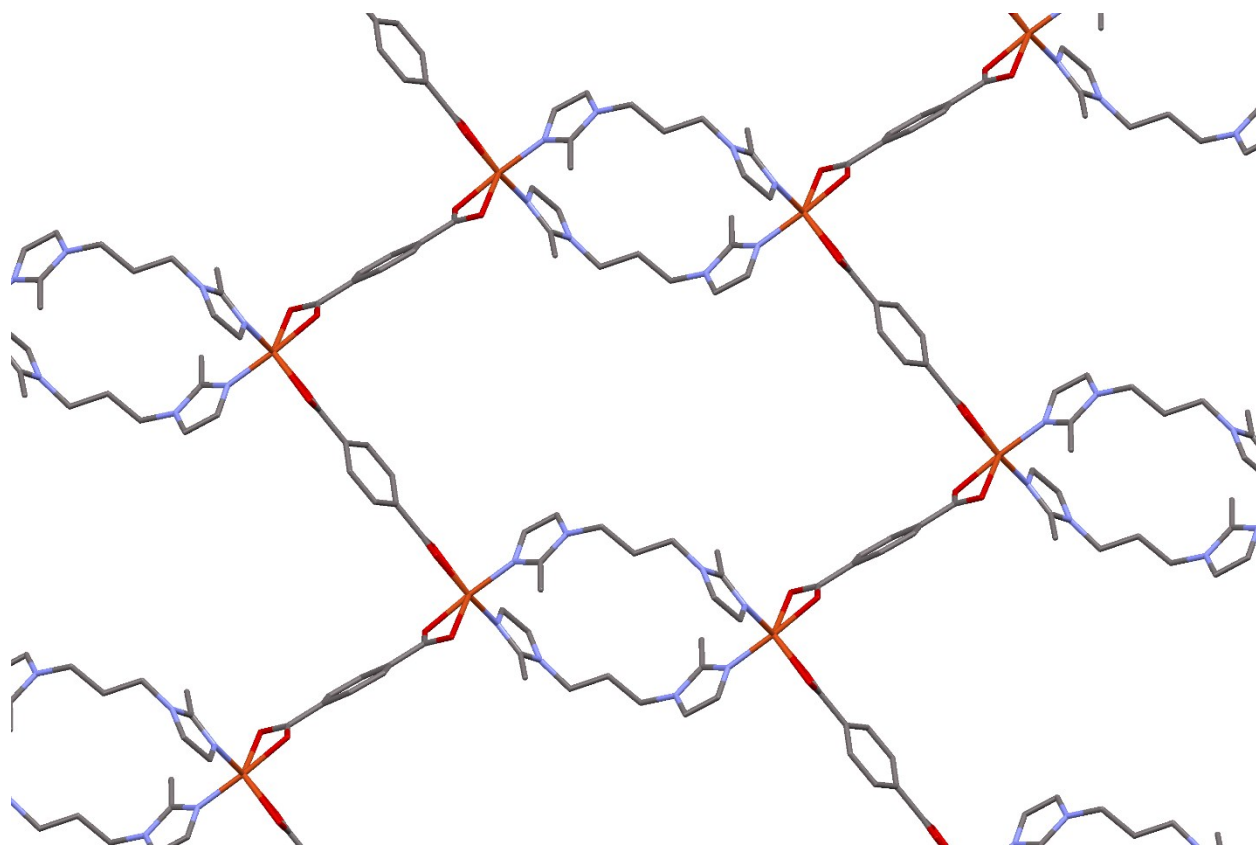

Fig. 3S. A view of schematic structure of compound 2.

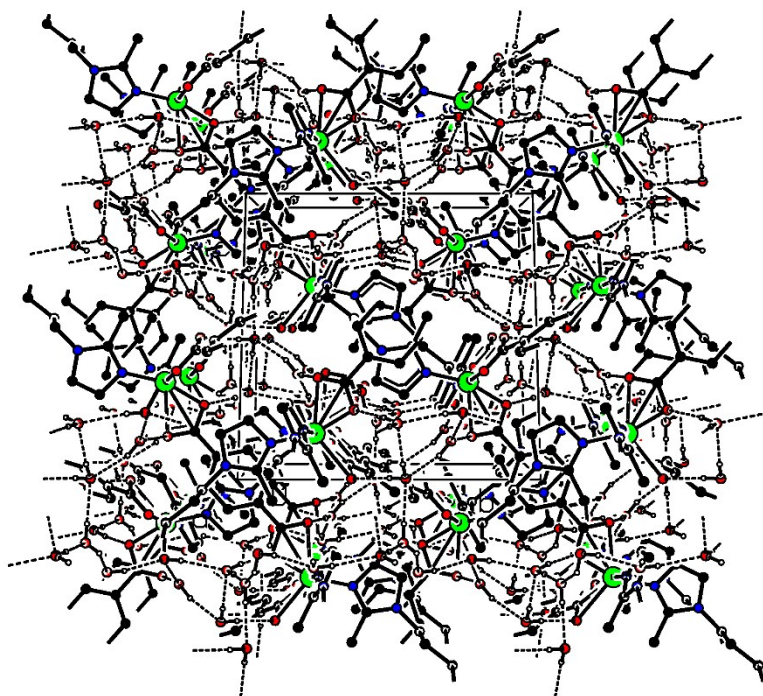

Fig. 4S. A view of 3D Hydrogen bonded network of compound 2 along  $a$  axis.

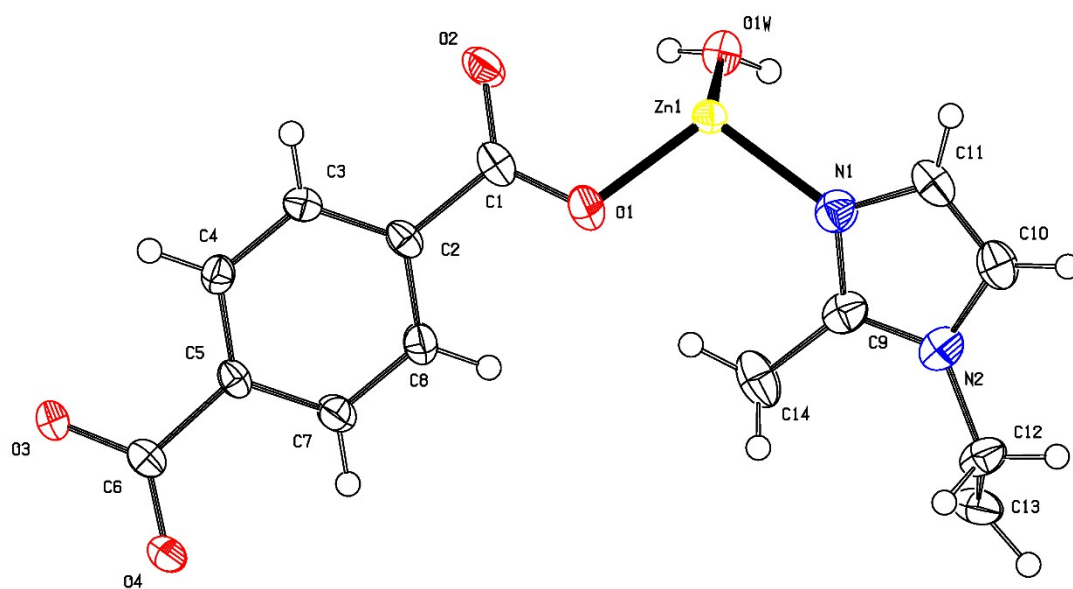

Fig. 5S. A view of asymmetric unit of molecular structure of compound 3, with atom labeling scheme.

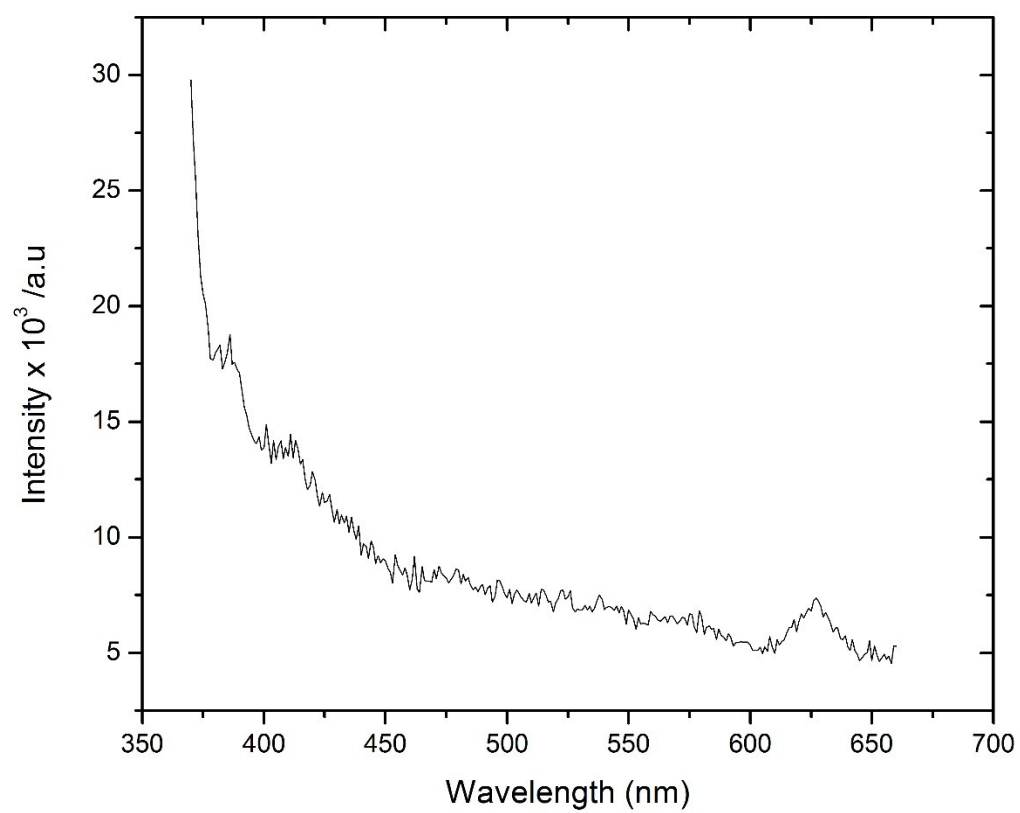

**Fig. 6S** Emission spectra of compound **1** at room temperature.
